# Supplementary material for: Response of Pasture Nitrogen Fertilization on Greenhouse Gas Emission and Net Protein Contribution of Nellore Young Bulls
Source: MDPI journal article supplement (doi:10.3390/ani12223173), 2022-11-16
Supplement: s1 [file s1]

**Table S1.** Weather data during experimental field data collection.

| <b>Monthly Weather Data</b> |                      |                      |                      |                          |           |
|-----------------------------|----------------------|----------------------|----------------------|--------------------------|-----------|
| <b>Month/year</b>           | <b>Tmax<br/>(°C)</b> | <b>Tmin<br/>(°C)</b> | <b>Tmed<br/>(°C)</b> | <b>Rainfall<br/>(mm)</b> | <b>ND</b> |
| Dec/2018                    | 32.0                 | 20.2                 | 25.2                 | 88.2                     | 16        |
| Jan/2019                    | 32.7                 | 20.9                 | 26.1                 | 148.1                    | 11        |
| Feb/2019                    | 30.9                 | 20.4                 | 24.4                 | 282.6                    | 17        |
| Mar/2019                    | 31.0                 | 20.1                 | 24.5                 | 115.2                    | 12        |
| Apr/2019                    | 30.6                 | 19.0                 | 23.9                 | 97.6                     | 6         |
| May/2019                    | 29.1                 | 16.4                 | 21.9                 | 24.2                     | 4         |
| Jun/2019                    | 27.5                 | 14.0                 | 20.7                 | 11.5                     | 2         |
| Jul/2019                    | 27.2                 | 12.2                 | 19.7                 | 9.3                      | 2         |
| Aug/2019                    | 29.2                 | 14.1                 | 21.7                 | 12.8                     | 3         |
| Sep/2019                    | 33.1                 | 18.0                 | 25.5                 | 79.8                     | 6         |

Pressure: atmospheric pressure; Tmax: maximum temperature; Tmin: minimum temperature; Tmed: average temperature; ND: number of rainy days.

Data obtained from the agroclimatological station of the Faculty of Agricultural and Veterinary Sciences, Unesp, Jaboticabal campus.

**Table S2.** Chemical composition of the mineral mix offered from December to March, and the supplement supplied from April to June, during background phase.

| <b>Variable<sup>1</sup></b>          | <b>Mineral Mix</b> | <b>Supplement</b> |
|--------------------------------------|--------------------|-------------------|
| <b>Ingredients, % of DM</b>          |                    |                   |
| Cotton seed meal                     | -                  | 37                |
| Defatted corn germ                   | -                  | 21.9              |
| Urea                                 | -                  | 4.6               |
| Mineral mix                          | 100                | 36.5              |
| <b>Chemical composition, % of DM</b> |                    |                   |
| Calcium                              | 14.5               | 13                |
| Phosphorus                           | 8                  | 2                 |
| Magnesium                            | 1                  | 0.2               |
| Sulfur                               | 4                  | 2                 |
| Sodium                               | 13                 | 3                 |
| Crude Protein                        | -                  | 32.4              |
| NDF <sub>om</sub>                    | -                  | 14.5              |

<sup>1</sup> NDF<sub>om</sub> = neutral detergent fiber exclusive of ash.

**Table S3.** Ingredients and chemical composition of the supplement, forage, and total mixed ration (TMR) of Nellore cattle during the finishing phase under different production systems.

| Variable                                 | Production Systems <sup>1</sup> |                      |                     |                      |
|------------------------------------------|---------------------------------|----------------------|---------------------|----------------------|
|                                          | P0+PS                           |                      | P75N+F <sup>3</sup> | P150N+F <sup>3</sup> |
|                                          | Supplement                      | Pasture <sup>2</sup> |                     |                      |
| <b>Ingredients, % of DM <sup>3</sup></b> |                                 |                      |                     |                      |
| Sorghum silage                           | -                               | -                    | 20.0                | 20.0                 |
| Defatted corn germ                       | 94.4                            | -                    | 75.5                | 75.5                 |
| Urea                                     | 1.8                             | -                    | 1.5                 | 1.5                  |
| Mineral mix                              | 3.8                             | -                    | 3.0                 | 3.0                  |
| <b>Chemical composition <sup>4</sup></b> |                                 |                      |                     |                      |
| DM, % as fed basis                       | 85.5                            | -                    | 74.1                | 74.1                 |
| OM, % of DM                              | 93.4                            | 92.6                 | 90.5                | 90.5                 |
| CP, % of DM                              | 17.0                            | 7.3                  | 15.8                | 15.8                 |
| NDF <sub>om</sub> , % of DM              | 25.7                            | 57.5                 | 32.1                | 32.1                 |

<sup>1</sup> P0+PS: managed pasture without N fertilization during background and fed on pasture with high supplementation during finishing; P75N+F: managed pasture with fertilization of 75 kg N ha<sup>-1</sup> year<sup>-1</sup> during background and fed a total mixed ration (TMR) on feedlot during finishing; and P150N+F: managed pasture with fertilization of 150 kg N ha<sup>-1</sup> year<sup>-1</sup> during background and fed a TMR on feedlot during finishing.

<sup>2</sup> Hand-plucked forage sampled in August 2019.

<sup>3</sup> Composition of Total mixed ration.

<sup>4</sup> DM = dry matter; OM = organic matter, CP= crude protein; NDF= neutral detergent fiber exclusive of ash.

**Table S4.** Characteristics of Marandu palisade grass (*Urochloa brizantha* Hochst ex A. Rich Stapf cv. Marandu) pastures of different production systems with increasing levels of N fertilization during background (wet season).

| Pasture <sup>1</sup>                                   | Production System <sup>1</sup> |             |            |
|--------------------------------------------------------|--------------------------------|-------------|------------|
|                                                        | P0+PS                          | P75N+F      | Intensive  |
| <b>Characteristics <sup>2</sup></b>                    |                                |             |            |
| Herbage mass (10 <sup>3</sup> kg DM ha <sup>-1</sup> ) | 4.6 ± 1.2                      | 5.3 ± 1.58  | 5.0 ± 1.1  |
| Green leaves (%)                                       | 24.5 ± 3.8                     | 30 ± 6.2    | 33.1 ± 5.8 |
| Stem + sheath (%)                                      | 16.2 ± 6.0                     | 25.1 ± 8.9  | 28.6 ± 5.5 |
| Dead material (%)                                      | 59.3 ± 7.5                     | 44.9 ± 13.4 | 38.3 ± 7.6 |
| Forage allowance (kg DM kg <sup>-1</sup> BW)           | 3.0 ± 0.9                      | 1.9 ± 0.74  | 1.6 ± 0.4  |
| Leaf allowance (kg DM kg <sup>-1</sup> BW)             | 0.78 ± 0.2                     | 0.59 ± 0.25 | 0.54 ± 0.1 |
| <b>Chemical composition <sup>3</sup></b>               |                                |             |            |
| OM (% of DM)                                           | 91.4 ± 0.4                     | 91.8 ± 0.3  | 92.4 ± 0.5 |
| CP (% of DM)                                           | 11.0 ± 0.3                     | 14.7 ± 0.4  | 17.3 ± 0.5 |
| NDF <sub>om</sub> (% of DM)                            | 47.8 ± 8.9                     | 48.9 ± 4.3  | 47.5 ± 1.6 |
| ADF (% of DM)                                          | 21.5 ± 4.7                     | 19.9 ± 3.6  | 21.6 ± 2.6 |
| iNDF (% of DM)                                         | 19.5 ± 2.2                     | 17.2 ± 0.7  | 16.9 ± 2.6 |
| GE (MJ kg <sup>-1</sup> DM)                            | 17.0 ± 0.1                     | 17.3 ± 0.1  | 17.6 ± 0.1 |

<sup>1</sup> P0+PS: managed pasture without N fertilization during background and fed on pasture with high supplementation during finishing; P75N+F: managed pasture with fertilization of 75 kg N ha<sup>-1</sup> year<sup>-1</sup> during background and fed a total mixed ration (TMR) on feedlot during finishing; and P150N+F: managed pasture with fertilization of 150 kg N ha<sup>-1</sup> year<sup>-1</sup> during background and fed a TMR on feedlot during finishing.

<sup>2</sup> Means from January to May 2019, ± standard deviation.

<sup>3</sup> Hand plucked forage sampled in March 2019. BW = body weight; OM= organic matter; DM = dry matter; CP= crude protein; NDF<sub>om</sub> = neutral detergent fiber exclusive of ash; iNDF = indigestible NDF; GE = gross energy.
